# Supplementary material for: Autoinhibition and activation of myosin VI revealed by its cryo-EM structure
Source: PubMed Central journal article supplement (PMC10853514; doi:10.1038/s41467-024-45424-7), 2024-02-08
Supplement: 41467_2024_45424_MOESM3_ESM.pdf [file 41467_2024_45424_MOESM3_ESM.pdf]

## **DESCRIPTION FOR ADDITIONAL SUPPLEMENTARY FILES**

**Supplementary Movie 1:** 3.54- Å Cryo-EM map and atomic model of myosin VI in the autoinhibited state.

**Supplementary Movie 2:** 4.14- Å Cryo-EM map and atomic model of myosin VI with SAHE in the autoinhibited state.
